# Supplementary material
Source: PubMed Central journal article supplement (PMC6145290)
Supplement: gutjnl-2017-313863supp001.pdf [file gutjnl-2017-313863supp001.pdf]

## SUPPLEMENTARY TABLES

**Supplementary Table 1:** Summary of sequence read count, length, coverage, and unmapped reads for *H. pylori* whole genome sequences.

|                           | B128<br>single colonies |        |        | 7.13<br>single colonies |        |        | 7.13 iron-depleted<br>single colonies |         |         |         |         |         |         |         |         | 7.13 iron-replete<br>single colonies |         |         |         |         |         |         |         |         | Avg    |
|---------------------------|-------------------------|--------|--------|-------------------------|--------|--------|---------------------------------------|---------|---------|---------|---------|---------|---------|---------|---------|--------------------------------------|---------|---------|---------|---------|---------|---------|---------|---------|--------|
|                           | a                       | b      | c      | a                       | B      | c      | D1<br>a                               | D1<br>b | D1<br>c | D2<br>a | D2<br>b | D2<br>c | D3<br>a | D3<br>b | D3<br>c | R1<br>a                              | R1<br>b | R1<br>c | R2<br>a | R2<br>b | R2<br>c | R3<br>a | R3<br>b | R3<br>c |        |
| Total read count          | 117200                  | 641486 | 799182 | 145512                  | 477807 | 608988 | 732531                                | 691805  | 525715  | 755068  | 710201  | 587631  | 926113  | 556882  | 739911  | 782071                               | 665731  | 532379  | 839757  | 798556  | 636620  | 826301  | 494261  | 891463  | 645132 |
| Mean read length          | 260                     | 262    | 267    | 262                     | 238    | 265    | 267                                   | 265     | 264     | 265     | 266     | 264     | 265     | 266     | 265     | 266                                  | 266     | 266     | 266     | 266     | 266     | 266     | 266     | 253     | 263    |
| Minimum fold coverage     | 1                       | 5      | 3      | 1                       | 5      | 4      | 2                                     | 5       | 5       | 0       | 0       | 0       | 3       | 2       | 2       | 2                                    | 3       | 1       | 0       | 8       | 0       | 6       | 8       | 3       | 3      |
| Maximum fold coverage     | 45                      | 228    | 279    | 54                      | 170    | 221    | 303                                   | 266     | 205     | 274     | 269     | 242     | 326     | 236     | 271     | 252                                  | 233     | 192     | 292     | 294     | 239     | 281     | 197     | 308     | 237    |
| Average fold coverage     | 18                      | 101    | 128    | 23                      | 68     | 96     | 117                                   | 110     | 83      | 120     | 113     | 93      | 147     | 89      | 117     | 124                                  | 106     | 85      | 133     | 127     | 101     | 131     | 78      | 135     | 102    |
| Standard deviation        | 4.8                     | 13.8   | 15.6   | 5.3                     | 11.6   | 13.6   | 16.6                                  | 16.2    | 13.8    | 17.2    | 17.0    | 14.8    | 20.0    | 14.3    | 16.3    | 18.3                                 | 14.9    | 12.3    | 17.6    | 17.2    | 15.3    | 15.8    | 11.3    | 17.2    | 14.6   |
| Unmapped reads            | 5789                    | 46287  | 55279  | 15978                   | 38984  | 52756  | 46802                                 | 48374   | 33760   | 54295   | 45959   | 47217   | 60683   | 39326   | 51092   | 58633                                | 45755   | 40762   | 47241   | 47787   | 39796   | 58373   | 41932   | 58569   | 45060  |
| Percentage unmapped reads | 4.7                     | 6.7    | 6.5    | 9.8                     | 7.5    | 7.9    | 6.0                                   | 6.5     | 6.0     | 6.7     | 6.0     | 7.4     | 6.1     | 6.6     | 6.4     | 6.9                                  | 6.4     | 7.1     | 5.3     | 5.6     | 5.8     | 6.6     | 7.8     | 6.1     | 6.6    |

All sequences covered the total length of the *H. pylori* reference strain B8 genome (1,673,997 base pairs) and all sequenced strains had a GC content of 38.8%. D1-3 and R1-3 designate independent gerbils maintained on either iron-depleted (N=3) or iron-replete (N=3) diets, respectively, while a-c designate independent single colonies isolated from each gerbil. Avg represents the average among all 24 single colony isolates.

**Supplementary Table 2:** Unique single nucleotide polymorphisms in *H. pylori* strains B128, 7.13, and *in vivo*-adapted strains isolated from gerbils maintained on iron-depleted or iron-replete diets, relative to *H. pylori* reference strain B8.

| Location                                        | Gene                       | HPB8 locus |
|-------------------------------------------------|----------------------------|------------|
| <b>B128 single colonies (N=26)</b>              |                            |            |
| 17317                                           | hypothetical               | 13         |
| 97985                                           | intergenic                 |            |
| 132884                                          | <i>tonB1</i>               | 138        |
| 132888                                          | <i>tonB1</i>               | 138        |
| 132892                                          | <i>tonB1</i>               | 138        |
| 132919                                          | <i>tonB1</i>               | 138        |
| 237373                                          | <i>purD</i>                | 270        |
| 308952                                          | putative OMP               | 342        |
| 342359                                          | <i>pal</i>                 | 375        |
| 397298                                          | <i>fucT1</i>               | 427        |
| 447957                                          | intergenic                 |            |
| 559618                                          | hypothetical               | 587        |
| 591318                                          | putative OMP               | 626        |
| 616637                                          | DNA methyl-transferase     | 642        |
| 628583                                          | intergenic                 |            |
| 692324                                          | <i>cagY</i>                | 716        |
| 727820                                          | hypothetical               | 750        |
| 798239                                          | glycosyltransferase        | 817        |
| 833169                                          | <i>fucT7</i>               | 854        |
| 883216                                          | <i>hyuA1</i>               | 895        |
| 883595                                          | <i>hyuA1</i>               | 895        |
| 913806                                          | <i>mesE</i>                | 927        |
| 1195655                                         | <i>fliF</i>                | 1220       |
| 1197192                                         | intergenic                 |            |
| 1221163                                         | polysaccharide deacetylase | 1252       |
| 1355221                                         | ABC transporter            | 1382       |
| <b>7.13 single colonies (N=2)</b>               |                            |            |
| 846179                                          | <i>rnc</i>                 | 865        |
| 1064308                                         | <i>katA</i>                | 1087       |
| <b>7.13 iron-replete single colonies (N=29)</b> |                            |            |
| 102469                                          | intergenic                 |            |
| 203750                                          | <i>oppA</i>                | 228        |
| 210808                                          | intergenic                 |            |
| 211182                                          | <i>babB</i>                | 237        |
| 236057                                          | hypothetical               | 268        |
| 264278                                          | intergenic                 |            |
| 692170                                          | <i>cagY</i>                | 716        |
| 692177                                          | <i>cagY</i>                | 716        |
| 692240                                          | <i>cagY</i>                | 716        |
| 692255                                          | <i>cagY</i>                | 716        |
| 692262                                          | <i>cagY</i>                | 716        |
| 692423                                          | <i>cagY</i>                | 716        |
| 692426                                          | <i>cagY</i>                | 716        |
| 692441                                          | <i>cagY</i>                | 716        |
| 799893                                          | glycosyltransferase        | 818        |
| 799896                                          | glycosyltransferase        | 818        |
| 1001780                                         | intergenic                 |            |
| 1064871                                         | intergenic                 |            |
| 1098589                                         | <i>hsdR5</i>               | 1120       |
| 1283634                                         | conserved hypothetical OMP | 1309       |
| 1289275                                         | intergenic                 |            |
| 1369139                                         | <i>prfB</i>                | 1395       |
| 1377466                                         | <i>hcpD</i>                | 1405       |
| 1377469                                         | <i>hcpD</i>                | 1405       |
| 1377477                                         | <i>hcpD</i>                | 1405       |
| 1533078                                         | predicted coding region    | 1561       |
| 1533082                                         | predicted coding region    | 1561       |
| 1533085                                         | predicted coding region    | 1561       |

|                                                  |                         |      |
|--------------------------------------------------|-------------------------|------|
| 1533088                                          | predicted coding region | 1561 |
| <b>7.13 iron-depleted single colonies (N=49)</b> |                         |      |
| 273162                                           | hypothetical            | 303  |
| 273165                                           | hypothetical            | 303  |
| 365607                                           | intergenic              |      |
| 563546                                           | hypothetical            | 593  |
| 591626                                           | putative OMP            | 626  |
| 591635                                           | putative OMP            | 626  |
| 591638                                           | putative OMP            | 626  |
| 591647                                           | putative OMP            | 626  |
| 607701                                           | intergenic              |      |
| 666812                                           | <i>nudT14</i>           | 691  |
| 692887                                           | <i>cagY</i>             | 716  |
| 693420                                           | <i>cagY</i>             | 716  |
| 693440                                           | <i>cagY</i>             | 716  |
| 693451                                           | <i>cagY</i>             | 716  |
| 693458                                           | <i>cagY</i>             | 716  |
| 693460                                           | <i>cagY</i>             | 716  |
| 693464                                           | <i>cagY</i>             | 716  |
| 693465                                           | <i>cagY</i>             | 716  |
| 693471                                           | <i>cagY</i>             | 716  |
| 693476                                           | <i>cagY</i>             | 716  |
| 693483                                           | <i>cagY</i>             | 716  |
| 693488                                           | <i>cagY</i>             | 716  |
| 693497                                           | <i>cagY</i>             | 716  |
| 693503                                           | <i>cagY</i>             | 716  |
| 693505                                           | <i>cagY</i>             | 716  |
| 693508                                           | <i>cagY</i>             | 716  |
| 693513                                           | <i>cagY</i>             | 716  |
| 693539                                           | <i>cagY</i>             | 716  |
| 819621                                           | <i>oipA</i>             | 838  |
| 1084103                                          | putative OMP            | 1104 |
| 1084106                                          | putative OMP            | 1104 |
| 1084152                                          | putative OMP            | 1104 |
| 1084170                                          | putative OMP            | 1104 |
| 1084521                                          | putative OMP            | 1104 |
| 1084524                                          | putative OMP            | 1104 |
| 1084548                                          | putative OMP            | 1104 |
| 1084553                                          | putative OMP            | 1104 |
| 1084556                                          | putative OMP            | 1104 |
| 1084577                                          | putative OMP            | 1104 |
| 1084581                                          | putative OMP            | 1104 |
| 1084587                                          | putative OMP            | 1104 |
| 1117619                                          | hypothetical            | 1139 |
| 1130504                                          | <i>pepP</i>             | 1155 |
| 1171489                                          | hypothetical            | 1200 |
| 1302387                                          | <i>hcpE</i>             | 1328 |
| 1405574                                          | hypothetical            | 1436 |
| 1414196                                          | intergenic              |      |
| 1445365                                          | <i>hrgA</i>             | 1474 |
| 1477835                                          | hypothetical            | 1508 |

Color-coded regions separate unique SNPs from *H. pylori* strains B128 (green), 7.13 (orange), or *in vivo*-adapted strains isolated from iron-depleted (blue) or iron-replete (red) diets. OMP=outer membrane protein.

**Supplementary Table 3:** Unique genetic loci with single and multinucleotide polymorphisms in *H. pylori* strains B128, 7.13, and *in vivo*-adapted strains isolated from gerbils maintained on iron-depleted or iron-replete diets.

| Variant  |              |            | B128 single colonies |     |             | 7.13 single colonies |     |     | 7.13 iron-depleted single colonies |      |             |             |      |      |      |      |      | 7.13 iron-replete single colonies |      |      |      |      |      |      |      |      |
|----------|--------------|------------|----------------------|-----|-------------|----------------------|-----|-----|------------------------------------|------|-------------|-------------|------|------|------|------|------|-----------------------------------|------|------|------|------|------|------|------|------|
| Location | Gene         | HPB8 locus | a                    | b   | c           | a                    | b   | c   | D1 a                               | D1 b | D1 c        | D2 a        | D2 b | D2 c | D3 a | D3 b | D3 c | R1 a                              | R1 b | R1 c | R2 a | R2 b | R2 c | R3 a | R3 b | R3 c |
| 17317    | hypothetical | 13         | 100                  | 100 | 100         |                      |     |     |                                    |      |             |             |      |      |      |      |      |                                   |      |      |      |      |      |      |      |      |
| 88333    | intergenic   |            |                      |     |             |                      |     |     | 26                                 | 29   | 31          | 29          | 26   | 45   | 31   | 33   | 29   | 46                                | 28   | 30   |      | 33   | 30   | 26   | 26   | 30   |
| 88334    | intergenic   |            |                      | 49  |             |                      | 46  |     |                                    |      |             |             |      | 54   |      |      |      |                                   |      |      | 52   |      |      |      |      |      |
| 97985    | intergenic   |            | 47                   | 54  | 48          |                      |     |     |                                    |      |             |             |      |      |      |      |      |                                   |      |      |      |      |      |      |      |      |
| 102469   | intergenic   |            |                      |     |             |                      |     |     |                                    |      |             |             |      |      |      |      |      |                                   |      |      | 75   |      |      |      |      |      |
| 118890   | <i>fliI</i>  | 124        |                      |     |             |                      |     |     | 100                                | 100  | 100         | 100         | 100  | 100  | 100  | 100  | 100  | 100                               | 99   | 99   | 100  | 100  | 100  | 100  | 100  | 100  |
| 132300   | intergenic   |            |                      |     |             |                      | 70  |     |                                    | 65   |             |             |      | 63   |      |      |      | 58                                | 55   |      | 52   |      |      | 62   | 66   | 50   |
| 132884   | <i>tonB1</i> | 138        |                      | 27  | 44.3 - 46.2 |                      |     |     |                                    |      |             |             |      |      |      |      |      |                                   |      |      |      |      |      |      |      |      |
| 132888   | <i>tonB1</i> | 138        |                      | 31  |             |                      |     |     |                                    |      |             |             |      |      |      |      |      |                                   |      |      |      |      |      |      |      |      |
| 132892   | <i>tonB1</i> | 138        |                      | 33  |             |                      |     |     |                                    |      |             |             |      |      |      |      |      |                                   |      |      |      |      |      |      |      |      |
| 132919   | <i>tonB1</i> | 138        |                      | 25  |             |                      |     |     |                                    |      |             |             |      |      |      |      |      |                                   |      |      |      |      |      |      |      |      |
| 132926   | <i>tonB1</i> | 138        |                      |     |             |                      |     |     | 85                                 | 90   | 79.7 - 81.4 | 80.6 - 81.6 | 77   | 92   |      |      |      |                                   |      | 75   | 76   |      |      |      |      |      |
| 203750   | <i>oppA</i>  | 228        |                      |     |             |                      |     |     |                                    |      |             |             |      |      |      |      |      |                                   |      |      |      |      |      |      |      |      |
| 210808   | intergenic   |            |                      |     |             |                      |     |     |                                    |      |             |             |      |      |      |      |      | 50                                |      |      |      |      |      |      |      |      |
| 211182   | <i>babB</i>  | 237        |                      |     |             |                      |     |     |                                    |      |             |             |      |      |      |      |      | 97                                |      |      |      |      |      |      |      |      |
| 211347   | <i>babB</i>  | 237        |                      |     | 28          |                      | 40  | 28  | 37                                 | 26   |             |             | 28   |      |      | 26   | 32   | 30                                | 29   |      |      |      | 27   |      |      | 26   |
| 211415   | <i>babB</i>  | 237        |                      | 26  | 34          |                      | 35  | 36  | 38                                 | 32   |             |             |      |      |      | 27   | 29   |                                   | 34   |      |      |      | 26   |      |      |      |
| 211583   | <i>babB</i>  | 237        |                      |     |             |                      |     |     | 38                                 | 45   |             | 38          | 47   | 38   |      |      |      | 98                                | 44   | 39   |      | 39   |      |      |      | 38   |
| 211592   | <i>babB</i>  | 237        | 31                   | 46  | 46          | 50                   | 48  | 44  | 39                                 | 46   |             | 38          | 47   | 39   |      |      |      | 98                                | 46   | 38   |      | 39   |      |      |      | 37   |
| 211690   | <i>babB</i>  | 237        | 35                   | 42  | 45          | 65                   | 61  | 47  | 42                                 | 43   |             |             |      |      |      |      |      | 97                                |      | 40   |      | 44   |      |      |      | 47   |
| 211694   | <i>babB</i>  | 237        |                      |     |             |                      |     |     | 43                                 | 41   |             |             |      |      |      |      |      | 95                                |      | 40   |      | 42   |      |      |      | 47   |
| 211838   | <i>babB</i>  | 237        | 40                   | 40  | 47          | 67                   | 53  | 43  | 56                                 | 45   | 52          | 52          | 49   | 52   | 38   | 43   | 49   | 97                                | 50   | 51   | 45   | 39   | 50   | 45   | 54   | 48   |
| 211844   | <i>babB</i>  | 237        | 33                   | 39  | 47          | 73                   | 52  | 43  |                                    |      |             |             |      |      |      |      |      | 99                                |      |      |      |      |      |      |      |      |
| 212150   | <i>babB</i>  | 237        |                      |     |             |                      |     |     | 54                                 | 36   | 56          | 42          | 51   | 52   | 41   | 49   | 44   | 98                                | 53   | 41   | 56   | 48   | 45   |      |      | 49   |
| 212315   | <i>babB</i>  | 237        | 69                   | 42  | 48          | 40                   | 55  | 49  | 46                                 | 44   | 58          | 45          | 46   | 55   | 43   | 50   | 50   | 98                                | 47   | 41   | 61   | 53   | 43   |      |      | 49   |
| 236057   | hypothetical | 268        |                      |     |             |                      |     |     |                                    |      |             |             |      |      |      |      |      |                                   |      |      | 96   |      |      |      |      |      |
| 237373   | <i>purD</i>  | 270        | 100                  | 100 | 100         |                      |     |     |                                    |      |             |             |      |      |      |      |      |                                   |      |      |      |      |      |      |      |      |
| 263819   | intergenic   |            |                      |     |             |                      |     |     | 100                                | 100  | 100         | 100         | 100  | 99   | 100  | 100  | 100  | 100                               | 100  | 100  | 99   | 100  | 100  | 100  | 100  | 100  |
| 263909   | <i>rpsL</i>  | 294        | 100                  | 97  | 99          | 93                   | 99  | 97  | 98                                 | 98   | 97          | 99          | 98   | 99   | 97   | 97   | 95   | 96                                | 99   | 97   | 98   | 97   | 97   | 98   | 98   | 97   |
| 263920   | <i>rpsL</i>  | 294        | 100                  | 100 | 100         | 100                  | 100 | 100 | 100                                | 100  | 100         | 100         | 100  | 100  | 100  | 100  | 99   | 100                               | 100  | 100  | 99   | 100  | 99   | 100  | 100  | 100  |
| 263985   | <i>rpsL</i>  | 294        |                      |     |             |                      |     |     | 100                                | 100  | 98          | 100         | 99   | 98   | 99   | 97   | 98   | 98                                | 96   | 98   | 100  | 100  | 99   | 99   | 99   | 98   |
| 264004   | <i>rpsL</i>  | 294        | 100                  | 100 | 100         | 100                  | 100 | 100 | 100                                | 100  | 100         | 100         | 100  | 100  | 100  | 100  | 100  | 100                               | 100  | 100  | 100  | 100  | 100  | 100  | 100  | 100  |
| 264055   | <i>rpsL</i>  | 294        | 100                  | 99  | 100         | 100                  | 100 | 99  | 100                                | 100  | 100         | 100         | 100  | 100  | 100  | 100  | 100  | 100                               | 100  | 99   | 99   | 100  | 99   | 100  | 100  | 100  |
| 264145   | <i>rpsL</i>  | 294        |                      |     |             |                      |     |     | 100                                | 99   | 100         | 100         | 99   | 99   | 99   | 100  | 99   | 100                               | 100  | 100  | 99   | 100  | 100  | 99   | 100  | 100  |
| 264157   | <i>rpsL</i>  | 294        | 100                  | 99  | 100         | 100                  | 100 | 100 | 100                                | 100  | 98          | 100         | 100  | 100  | 99   | 100  | 99   | 99                                | 100  | 100  | 99   | 100  | 100  | 99   | 100  | 100  |
| 264163   | <i>rpsL</i>  | 294        | 100                  | 100 | 100         | 100                  | 100 | 100 | 100                                | 100  | 99          | 100         | 100  | 100  | 100  | 100  | 100  | 100                               | 99   | 100  | 100  | 100  | 100  | 99   | 100  | 99   |

|        |                        |     |     |     |     |     |     |     |     |     |     |                   |     |     |     |     |     |     |     |     |     |     |     |     |     |     |     |
|--------|------------------------|-----|-----|-----|-----|-----|-----|-----|-----|-----|-----|-------------------|-----|-----|-----|-----|-----|-----|-----|-----|-----|-----|-----|-----|-----|-----|-----|
| 264229 | <i>rpsL</i>            | 294 |     |     |     |     |     |     | 99  | 100 | 100 | 100               | 100 | 100 | 100 | 100 | 100 | 100 | 100 | 100 | 100 | 100 | 100 | 100 | 100 | 100 | 100 |
| 264278 | intergenic             |     |     |     |     |     |     |     |     |     |     |                   |     |     |     |     |     |     |     | 99  |     |     |     |     |     |     |     |
| 264279 | intergenic             |     | 100 | 100 | 100 | 100 | 100 | 100 | 100 | 99  | 100 | 100               | 100 | 100 | 100 | 100 | 100 | 100 | 100 | 99  | 100 | 100 | 100 | 100 | 100 | 100 | 100 |
| 264349 | <i>rpsG</i>            | 295 | 100 | 99  | 100 | 100 | 100 | 100 | 99  | 99  | 100 | 99                | 99  | 100 | 99  | 100 | 99  | 99  | 100 | 100 | 99  | 98  | 100 | 100 | 100 | 100 | 99  |
| 264366 | <i>rpsG</i>            | 295 |     |     |     |     |     |     | 97  | 100 | 99  | 100               | 100 | 100 | 100 | 100 | 100 | 99  | 99  | 98  | 100 | 100 | 99  | 100 | 100 | 100 | 100 |
| 264374 | <i>rpsG</i>            | 295 | 100 | 100 | 100 | 100 | 98  | 100 | 99  | 100 | 100 | 100               | 100 | 100 | 100 | 100 | 100 | 100 | 100 | 99  | 99  | 100 | 100 | 100 | 100 | 100 | 100 |
| 264391 | <i>rpsG</i>            | 295 | 100 | 100 | 100 | 100 | 100 | 100 | 100 | 100 | 100 | 100               | 100 | 100 | 100 | 100 | 100 | 100 | 100 | 100 | 100 | 100 | 100 | 100 | 100 | 100 | 100 |
| 273162 | hypothetical           | 303 |     |     |     |     |     |     |     |     |     | 26                |     |     |     |     |     |     |     |     |     |     |     |     |     |     |     |
| 273165 | hypothetical           | 303 |     |     |     |     |     |     |     |     |     | 26                |     |     |     |     |     |     |     |     |     |     |     |     |     |     |     |
| 293971 | intergenic             |     |     |     |     |     | 93  | 93  | 95  | 91  | 94  | 94                | 96  | 93  | 96  | 93  | 92  | 96  | 96  | 95  | 93  | 95  | 97  | 95  | 92  | 95  | 95  |
| 308952 | putative OMP           | 342 | 94  | 100 | 99  |     |     |     |     |     |     |                   |     |     |     |     |     |     |     |     |     |     |     |     |     |     |     |
| 342359 | <i>pal</i>             | 375 | 100 | 100 | 100 |     |     |     |     |     |     |                   |     |     |     |     |     |     |     |     |     |     |     |     |     |     |     |
| 365607 | intergenic             |     |     |     |     |     |     |     |     |     |     | 94                |     |     |     |     |     |     |     |     |     |     |     |     |     |     |     |
| 397298 | <i>fucT1</i>           | 427 | 25  | 35  | 26  |     |     |     |     |     |     |                   |     |     |     |     |     |     |     |     |     |     |     |     |     |     |     |
| 447957 | intergenic             |     |     | 100 | 98  |     |     |     |     |     |     |                   |     |     |     |     |     |     |     |     |     |     |     |     |     |     |     |
| 471641 | intergenic             |     | 100 | 95  | 97  | 81  | 97  | 93  | 95  | 92  | 92  | 93                | 98  | 93  | 95  | 94  | 95  | 90  | 94  | 95  | 94  | 93  | 94  | 86  | 93  | 91  | 91  |
| 559618 | hypothetical           | 587 | 95  | 100 | 100 |     |     |     |     |     |     |                   |     |     |     |     |     |     |     |     |     |     |     |     |     |     |     |
| 563546 | hypothetical           | 593 |     |     |     |     |     |     |     |     |     |                   |     | 99  | 100 | 100 |     |     |     |     |     |     |     |     |     |     |     |
| 591318 | putative OMP           | 626 |     | 100 | 100 |     |     |     |     |     |     |                   |     |     |     |     |     |     |     |     |     |     |     |     |     |     |     |
| 591626 | putative OMP           | 626 |     |     |     |     |     |     |     |     |     | 32.5<br>-<br>32.7 | 30  |     |     |     |     |     |     |     |     |     |     |     |     |     |     |
| 591635 | putative OMP           | 626 |     |     |     |     |     |     |     |     |     | 33                | 30  |     |     |     |     |     |     |     |     |     |     |     |     |     |     |
| 591638 | putative OMP           | 626 |     |     |     |     |     |     |     |     |     | 31                | 27  |     |     |     |     |     |     |     |     |     |     |     |     |     |     |
| 591647 | putative OMP           | 626 |     |     |     |     |     |     |     |     |     | 30                | 27  |     |     |     |     |     |     |     |     |     |     |     |     |     |     |
| 607701 | intergenic             |     |     |     |     |     |     |     |     |     | 63  |                   |     |     |     |     |     |     |     |     |     |     |     |     |     |     |     |
| 616637 | DNA methyl-transferase | 642 | 100 | 99  | 100 |     |     |     |     |     |     |                   |     |     |     |     |     |     |     |     |     |     |     |     |     |     |     |
| 628583 | intergenic             |     |     | 29  |     |     |     |     |     |     |     |                   |     |     |     |     |     |     |     |     |     |     |     |     |     |     |     |
| 629024 | <i>babA</i>            | 657 |     |     |     |     |     |     | 83  | 84  | 33  | 80                | 80  | 78  | 83  | 78  | 87  | 96  | 88  | 86  | 79  | 78  | 77  | 85  | 83  | 79  | 79  |
| 629189 | <i>babA</i>            | 657 |     | 68  | 81  | 61  | 50  | 74  | 66  | 80  | 29  | 70                | 70  | 65  | 69  | 63  | 76  | 72  | 74  | 61  |     | 68  |     |     | 68  |     |     |
| 629257 | <i>babA</i>            | 657 | 33  | 69  | 74  | 69  | 54  | 69  | 65  | 72  |     |                   |     |     | 65  | 57  | 76  |     | 70  |     |     | 66  |     |     |     |     |     |
| 629425 | <i>babA</i>            | 657 |     |     |     |     |     |     | 47  | 47  |     | 58                | 51  | 43  |     |     |     | 99  | 53  | 39  |     | 52  |     |     | 52  |     |     |
| 629434 | <i>babA</i>            | 657 | 29  | 51  | 56  | 46  | 45  | 55  | 47  | 43  |     | 57                | 47  | 42  |     |     |     | 99  | 52  | 39  |     | 52  |     |     | 53  |     |     |
| 629532 | <i>babA</i>            | 657 |     | 45  | 60  | 42  | 41  | 51  | 53  | 47  |     |                   |     |     |     |     |     | 96  |     | 46  |     | 56  |     |     | 42  |     |     |
| 629536 | <i>babA</i>            | 657 |     |     |     |     |     |     | 52  | 48  |     |                   |     |     |     |     |     | 96  |     | 43  |     | 53  |     |     | 41  |     |     |
| 629680 | <i>babA</i>            | 657 | 33  | 39  | 49  | 44  | 65  | 42  | 53  | 52  | 42  | 47                | 43  | 47  | 44  | 41  | 59  | 100 | 44  | 41  | 39  | 51  | 51  | 45  | 52  | 51  | 51  |
| 629686 | <i>babA</i>            | 657 | 33  | 39  | 48  | 52  | 63  | 41  |     |     |     |                   |     |     |     |     |     | 98  |     |     |     |     |     |     |     |     |     |
| 629992 | <i>babA</i>            | 657 |     |     |     |     |     |     | 48  | 47  | 64  | 48                | 46  | 49  | 44  | 57  | 53  | 100 | 49  | 42  | 44  | 42  | 53  |     | 50  |     |     |
| 630157 | <i>babA</i>            | 657 | 56  | 54  | 41  | 59  | 47  | 44  | 43  | 47  | 51  | 44                | 42  | 42  | 45  | 55  | 60  | 100 | 44  | 45  | 48  | 41  | 40  |     | 48  |     |     |
| 630946 | <i>babA</i>            | 657 |     | 59  | 67  |     | 47  | 61  | 77  | 52  | 61  | 64                | 50  | 81  | 75  | 59  | 54  | 69  | 66  | 61  | 63  | 61  | 84  | 68  | 50  | 53  | 53  |
| 630951 | <i>babA</i>            | 657 |     |     |     |     |     |     | 80  | 58  | 60  | 66                | 50  | 81  | 77  | 59  | 57  | 71  | 65  | 61  | 64  | 64  | 84  | 68  | 52  | 54  | 54  |

|        |                      |     |     |     |     |     |     |     |    |     |    |     |     |     |    |     |    |    |     |    |    |    |     |     |      |    |
|--------|----------------------|-----|-----|-----|-----|-----|-----|-----|----|-----|----|-----|-----|-----|----|-----|----|----|-----|----|----|----|-----|-----|------|----|
| 630954 | <i>babA</i>          | 657 |     | 59  | 64  |     | 47  | 63  | 83 | 58  | 60 | 63  | 50  | 81  | 77 | 62  | 59 | 76 | 68  | 61 | 66 | 64 | 84  | 68  | 53   | 54 |
| 630975 | <i>babA</i>          | 657 |     | 54  | 65  |     | 48  | 55  | 79 | 57  | 58 | 64  | 48  | 81  | 75 | 60  | 60 | 80 | 71  | 64 | 64 | 59 | 88  | 69  | 55   | 58 |
| 630987 | <i>babA</i>          | 657 |     | 47  | 63  |     | 39  | 58  | 81 | 50  | 63 | 60  | 47  | 79  | 71 | 59  | 46 | 74 | 67  | 65 | 55 | 58 | 92  | 64  | 55   | 44 |
| 630989 | <i>babA</i>          | 657 |     | 50  | 63  |     | 39  | 58  | 81 | 50  | 63 | 63  | 42  | 79  | 75 | 59  | 50 | 74 | 67  | 60 | 58 | 58 | 83  | 64  | 55   | 44 |
| 630991 | intergenic           |     |     | 50  | 63  |     | 39  | 58  | 81 | 53  | 63 | 63  | 50  | 79  | 79 | 63  | 60 | 74 | 67  | 65 | 58 | 61 | 92  | 64  | 55   | 44 |
| 631022 | intergenic           |     |     |     | 85  |     | 69  | 82  |    | 77  | 84 |     | 85  |     | 96 | 91  | 93 |    | 89  | 94 | 81 | 79 | 100 | 84  | 76   | 78 |
| 631027 | intergenic           |     |     | 73  | 86  |     | 78  | 86  | 89 | 78  | 90 | 91  | 84  | 84  | 97 | 100 | 91 | 88 | 90  | 90 | 86 | 82 | 100 | 94  | 80   | 79 |
| 631033 | intergenic           |     |     | 90  | 80  |     | 77  | 83  | 95 | 27  | 73 | 96  | 86  | 78  | 89 | 87  | 87 | 75 | 87  | 78 | 82 | 78 | 96  | 91  | 79   | 84 |
| 666812 | <i>nudT14</i>        | 691 |     |     |     |     |     |     |    |     |    | 94  | 93  | 99  |    |     |    |    |     |    |    |    |     |     |      |    |
| 692170 | <i>cagY</i>          | 716 |     |     |     |     |     |     |    |     |    |     |     |     |    |     |    |    |     |    |    |    |     |     | 96.9 |    |
| 692177 | <i>cagY</i>          | 716 |     |     |     |     |     |     |    |     |    |     |     |     |    |     |    |    |     |    |    |    |     |     | 98.5 |    |
| 692240 | <i>cagY</i>          | 716 |     |     |     |     |     |     |    |     |    |     |     |     |    |     |    |    |     |    |    |    |     |     | 95   |    |
| 692255 | <i>cagY</i>          | 716 |     |     |     |     |     |     |    |     |    |     |     |     |    |     |    |    |     |    |    |    |     |     | 28   |    |
| 692262 | <i>cagY</i>          | 716 |     |     |     |     |     |     |    |     |    |     |     |     |    |     |    |    |     |    |    |    |     |     | 42   |    |
| 692324 | <i>cagY</i>          | 716 |     | 98  | 98  |     |     |     |    |     |    |     |     |     |    |     |    |    |     |    |    |    |     |     | 48   |    |
| 692423 | <i>cagY</i>          | 716 |     |     |     |     |     |     |    |     |    |     |     |     |    |     |    |    |     |    |    | 99 |     |     |      |    |
| 692426 | <i>cagY</i>          | 716 |     |     |     |     |     |     |    |     |    |     |     |     |    |     |    |    |     |    |    | 99 |     |     |      |    |
| 692441 | <i>cagY</i>          | 716 |     |     |     |     |     |     |    |     |    |     |     |     |    |     |    |    |     |    |    | 92 |     |     |      |    |
| 692493 | <i>cagY</i>          | 716 | 93  | 98  | 98  | 100 | 100 | 98  | 99 | 100 | 92 | 99  | 98  | 100 | 97 | 97  | 97 | 97 | 100 | 91 | 98 | 99 | 98  | 98  | 97   | 99 |
| 692498 | <i>cagY</i>          | 716 | 87  | 94  | 90  | 100 | 98  | 100 | 89 | 95  | 89 | 95  | 91  | 92  | 95 | 92  | 90 | 94 | 94  | 87 | 89 | 90 | 87  | 100 | 95   | 95 |
| 692887 | <i>cagY</i>          | 716 |     |     |     |     |     |     |    |     |    | 100 | 100 | 100 |    |     |    |    |     |    |    |    |     |     |      |    |
| 693420 | <i>cagY</i>          | 716 |     |     |     |     |     |     |    |     |    |     | 100 |     |    |     |    |    |     |    |    |    |     |     |      |    |
| 693440 | <i>cagY</i>          | 716 |     |     |     |     |     |     |    |     |    | 100 | 100 |     |    |     |    |    |     |    |    |    |     |     |      |    |
| 693451 | <i>cagY</i>          | 716 |     |     |     |     |     |     |    |     |    | 100 | 100 |     |    |     |    |    |     |    |    |    |     |     |      |    |
| 693458 | <i>cagY</i>          | 716 |     |     |     |     |     |     |    |     |    | 100 | 88  |     |    |     |    |    |     |    |    |    |     |     |      |    |
| 693460 | <i>cagY</i>          | 716 |     |     |     |     |     |     |    |     |    | 100 | 94  |     |    |     |    |    |     |    |    |    |     |     |      |    |
| 693464 | <i>cagY</i>          | 716 |     |     |     |     |     |     |    |     |    | 70  | 60  | 44  |    |     |    |    |     |    |    |    |     |     |      |    |
| 693465 | <i>cagY</i>          | 716 |     |     |     |     |     |     |    |     |    | 70  | 56  | 56  |    |     |    |    |     |    |    |    |     |     |      |    |
| 693471 | <i>cagY</i>          | 716 |     |     |     |     |     |     |    |     |    | 100 | 100 | 100 |    |     |    |    |     |    |    |    |     |     |      |    |
| 693476 | <i>cagY</i>          | 716 |     |     |     |     |     |     |    |     |    | 100 | 100 | 100 |    |     |    |    |     |    |    |    |     |     |      |    |
| 693483 | <i>cagY</i>          | 716 |     |     |     |     |     |     |    |     |    | 100 | 100 | 100 |    |     |    |    |     |    |    |    |     |     |      |    |
| 693488 | <i>cagY</i>          | 716 |     |     |     |     |     |     |    |     |    | 100 | 93  | 100 |    |     |    |    |     |    |    |    |     |     |      |    |
| 693497 | <i>cagY</i>          | 716 |     |     |     |     |     |     |    |     |    | 100 | 100 | 100 |    |     |    |    |     |    |    |    |     |     |      |    |
| 693503 | <i>cagY</i>          | 716 |     |     |     |     |     |     |    |     |    | 92  | 94  | 100 |    |     |    |    |     |    |    |    |     |     |      |    |
| 693505 | <i>cagY</i>          | 716 |     |     |     |     |     |     |    |     |    | 96  | 91  | 100 |    |     |    |    |     |    |    |    |     |     |      |    |
| 693508 | <i>cagY</i>          | 716 |     |     |     |     |     |     |    |     |    | 100 | 100 | 100 |    |     |    |    |     |    |    |    |     |     |      |    |
| 693513 | <i>cagY</i>          | 716 |     |     |     |     |     |     |    |     |    | 96  | 100 | 100 |    |     |    |    |     |    |    |    |     |     |      |    |
| 693539 | <i>cagY</i>          | 716 |     |     |     |     |     |     |    |     |    | 98  | 100 | 100 |    |     |    |    |     |    |    |    |     |     |      |    |
| 727820 | hypothetical         | 750 | 94  | 100 | 100 |     |     |     |    |     |    |     |     |     |    |     |    |    |     |    |    |    |     |     |      |    |
| 759720 | intergenic           |     |     |     |     |     |     |     | 68 |     |    | 66  | 65  |     |    | 74  | 72 |    |     | 74 |    |    | 63  | 63  |      | 70 |
| 798239 | glycosyl-transferase | 817 | 100 | 100 | 99  |     |     |     |    |     |    |     |     |     |    |     |    |    |     |    |    |    |     |     |      |    |
| 799893 | glycosyl-transferase | 818 |     |     |     |     |     |     |    |     |    |     |     |     |    |     |    | 51 | 45  |    |    |    | 34  |     |      |    |

|         |                        |      |     |     |    |  |    |    |     |     |     |     |     |     |     |     |     |     |     |     |     |     |     |     |     |     |    |
|---------|------------------------|------|-----|-----|----|--|----|----|-----|-----|-----|-----|-----|-----|-----|-----|-----|-----|-----|-----|-----|-----|-----|-----|-----|-----|----|
| 799896  | glycosyl-transferase   | 818  |     |     |    |  |    |    |     |     |     |     |     |     |     |     | 50  | 45  |     |     |     | 34  |     |     |     |     |    |
| 819621  | <i>oipA</i>            | 838  |     |     |    |  |    |    |     |     | 93  |     |     |     |     |     |     |     |     |     |     |     |     |     |     |     |    |
| 833169  | <i>fucT7</i>           | 854  | 63  | 66  | 65 |  |    |    |     |     |     |     |     |     |     |     |     |     |     |     |     |     |     |     |     |     |    |
| 846179  | <i>mnc</i>             | 865  |     |     |    |  |    |    | 68  |     |     |     |     |     |     |     |     |     |     |     |     |     |     |     |     |     |    |
| 883216  | <i>hyuA1</i>           | 895  | 93  | 99  | 98 |  |    |    |     |     |     |     |     |     |     |     |     |     |     |     |     |     |     |     |     |     |    |
| 883595  | <i>hyuA1</i>           | 895  | 100 | 96  | 97 |  |    |    |     |     |     |     |     |     |     |     |     |     |     |     |     |     |     |     |     |     |    |
| 913806  | <i>mesE</i>            | 927  | 69  | 51  | 42 |  |    |    |     |     |     |     |     |     |     |     |     |     |     |     |     |     |     |     |     |     |    |
| 919030  | <i>sabA</i>            | 930  | 92  | 91  | 87 |  |    |    |     |     | 91  | 88  |     |     |     |     |     |     |     |     |     |     |     |     |     |     |    |
| 1001780 | intergenic             |      |     |     |    |  |    |    |     |     |     |     |     |     |     |     |     |     |     |     |     |     |     | 100 | 100 | 100 |    |
| 1064308 | <i>katA</i>            | 1087 |     |     |    |  |    |    | 100 |     |     |     |     |     |     |     |     |     |     |     |     |     |     |     |     |     |    |
| 1064871 | intergenic             |      |     |     |    |  |    |    |     |     |     |     |     |     |     |     |     |     |     |     |     |     |     | 99  | 100 | 100 |    |
| 1065100 | intergenic             |      |     | 25  |    |  |    |    |     |     |     |     |     |     |     |     |     |     |     |     |     |     |     |     |     |     |    |
| 1082193 | DNA methyl-transferase | 1103 |     |     |    |  |    |    |     |     | 92  |     |     |     |     |     |     |     |     |     |     |     |     |     | 97  |     |    |
| 1084103 | putative OMP           | 1104 |     |     |    |  |    |    |     |     | 100 | 100 | 100 |     |     |     |     |     |     |     |     |     |     |     |     |     |    |
| 1084106 | putative OMP           | 1104 |     |     |    |  |    |    |     |     | 100 | 100 | 100 |     |     |     |     |     |     |     |     |     |     |     |     |     |    |
| 1084152 | putative OMP           | 1104 |     |     |    |  |    |    |     |     | 100 | 100 | 100 |     |     |     |     |     |     |     |     |     |     |     |     |     |    |
| 1084170 | putative OMP           | 1104 |     |     |    |  |    |    |     |     | 96  | 100 | 100 |     |     |     |     |     |     |     |     |     |     |     |     |     |    |
| 1084521 | putative OMP           | 1104 |     |     |    |  |    |    |     |     | 92  | 100 | 100 |     |     |     |     |     |     |     |     |     |     |     |     |     |    |
| 1084524 | putative OMP           | 1104 |     |     |    |  |    |    |     |     | 92  | 100 | 100 |     |     |     |     |     |     |     |     |     |     |     |     |     |    |
| 1084548 | putative OMP           | 1104 |     |     |    |  |    |    |     |     | 96  | 100 | 100 |     |     |     |     |     |     |     |     |     |     |     |     |     |    |
| 1084553 | putative OMP           | 1104 |     |     |    |  |    |    |     |     | 97  | 100 | 100 |     |     |     |     |     |     |     |     |     |     |     |     |     |    |
| 1084556 | putative OMP           | 1104 |     |     |    |  |    |    |     |     | 94  | 94  | 96  |     |     |     |     |     |     |     |     |     |     |     |     |     |    |
| 1084577 | putative OMP           | 1104 |     |     |    |  |    |    |     |     | 93  | 100 | 100 |     |     |     |     |     |     |     |     |     |     |     |     |     |    |
| 1084581 | putative OMP           | 1104 |     |     |    |  |    |    |     |     | 93  | 100 | 100 |     |     |     |     |     |     |     |     |     |     |     |     |     |    |
| 1084587 | putative OMP           | 1104 |     |     |    |  |    |    |     |     | 96  | 100 | 100 |     |     |     |     |     |     |     |     |     |     |     |     |     |    |
| 1098589 | <i>hsdR5</i>           | 1120 |     |     |    |  |    |    |     |     |     |     |     |     |     |     |     | 96  |     |     |     |     |     |     |     |     |    |
| 1117619 | hypothetical           | 1139 |     |     |    |  |    |    |     |     |     |     |     | 99  | 100 | 99  |     |     |     |     |     |     |     |     |     |     |    |
| 1122559 | <i>fur</i>             | 1145 |     |     |    |  |    | 98 |     | 100 | 99  | 100 | 100 | 100 | 99  | 100 | 100 | 100 | 100 | 100 | 100 | 100 | 100 | 100 | 100 | 100 |    |
| 1130504 | <i>pepP</i>            | 1155 |     |     |    |  |    |    |     |     |     |     |     |     |     | 100 |     |     |     |     |     |     |     |     |     |     |    |
| 1171489 | hypothetical           | 1200 |     |     |    |  |    |    |     | 99  |     |     |     |     |     |     |     |     |     |     |     |     |     |     |     |     |    |
| 1195655 | <i>fliF</i>            | 1220 | 100 | 100 | 99 |  |    |    |     |     |     |     |     |     |     |     |     |     |     |     |     |     |     |     |     |     |    |
| 1197192 | intergenic             |      | 42  | 26  | 49 |  |    |    |     |     |     |     |     |     |     |     |     |     |     |     |     |     |     |     |     |     |    |
| 1197193 | intergenic             |      |     | 50  |    |  | 59 | 57 | 59  | 56  | 48  | 57  | 51  | 52  | 54  | 52  | 55  | 55  |     |     | 57  | 51  | 57  | 62  |     | 55  | 62 |
| 1217501 | intergenic             |      |     |     |    |  |    |    |     |     |     |     | 53  |     |     |     |     | 46  | 44  |     |     |     |     |     | 53  |     |    |





**Supplementary Table 4:** Single nucleotide polymorphisms, multinucleotide polymorphisms, insertions and deletions in *H. pylori* B128 and 7.13 single colony isolates.

| Variants                   | B128 single colonies |    |    |           | 7.13 single colonies |    |    |           |
|----------------------------|----------------------|----|----|-----------|----------------------|----|----|-----------|
|                            | a                    | b  | c  | Avg       | a                    | b  | c  | Avg       |
| <b>Transitions (SNP)</b>   | 74                   | 88 | 84 | <b>98</b> | 33                   | 43 | 42 | <b>47</b> |
| <b>Transversions (SNP)</b> | 11                   | 14 | 13 |           | 5                    | 5  | 7  |           |
| <b>Substitutions (MNP)</b> | 2                    | 3  | 3  |           | 1                    | 2  | 2  |           |
| <b>Insertions</b>          | 8                    | 15 | 13 | <b>12</b> | 6                    | 12 | 9  | <b>9</b>  |
| <b>Deletions</b>           | 6                    | 16 | 14 | <b>10</b> | 4                    | 4  | 2  | <b>3</b>  |
| <b>Synonymous</b>          | 24                   | 33 | 30 | <b>29</b> | 11                   | 17 | 17 | <b>15</b> |
| <b>Non-synonymous</b>      | 55                   | 58 | 60 | <b>58</b> | 26                   | 29 | 29 | <b>28</b> |

Number of single nucleotide polymorphisms (SNPs), multinucleotide polymorphisms (MNPs), insertions, and deletions relative to the reference *H. pylori* B8 genome sequence. a-c designate individual single colonies isolated from a single gerbil. Avg represents the average number of variants among all three single colony isolates.

**Supplementary Table 5:** Single nucleotide polymorphisms, multinucleotide polymorphisms, insertions and deletions in *in vivo*-adapted *H. pylori* 7.13 single colony isolates harvested from gerbils maintained on iron-depleted or iron-replete diets.

| Variants                   | 7.13 iron-depleted single colonies |         |         |         |         |         |         |         |         | 7.13 iron-replete single colonies |         |         |         |         |         |         |         |         |         |           |   |
|----------------------------|------------------------------------|---------|---------|---------|---------|---------|---------|---------|---------|-----------------------------------|---------|---------|---------|---------|---------|---------|---------|---------|---------|-----------|---|
|                            | D1<br>a                            | D1<br>b | D1<br>c | D2<br>A | D2<br>b | D2<br>c | D3<br>a | D3<br>b | D3<br>c | Avg                               | R1<br>a | R1<br>b | R1<br>c | R2<br>a | R2<br>b | R2<br>c | R3<br>a | R3<br>b | R3<br>c | Avg       |   |
| <b>Transitions (SNP)</b>   | 40                                 | 41      | 31      | 55      | 56      | 51      | 31      | 37      | 36      | <b>52</b>                         | 46      | 39      | 37      | 35      | 42      | 31      | 30      | 38      | 27      | <b>43</b> |   |
| <b>Transversions (SNP)</b> | 6                                  | 6       | 4       | 12      | 10      | 8       | 4       | 3       | 3       |                                   | 6       | 4       | 7       | 4       | 6       | 4       | 4       | 6       | 4       |           | 4 |
| <b>Substitutions (MNP)</b> | 2                                  | 2       | 2       | 9       | 9       | 7       | 2       | 2       | 2       |                                   | 3       | 2       | 2       | 2       | 2       | 2       | 4       | 2       | 2       |           | 2 |
| <b>Insertions</b>          | 10                                 | 12      | 12      | 11      | 14      | 14      | 11      | 10      | 12      | <b>12</b>                         | 11      | 10      | 10      | 13      | 14      | 11      | 11      | 10      | 12      | <b>11</b> |   |
| <b>Deletions</b>           | 6                                  | 5       | 5       | 6       | 8       | 9       | 3       | 3       | 2       | <b>5</b>                          | 3       | 4       | 3       | 3       | 2       | 3       | 3       | 2       | 3       | <b>3</b>  |   |
| <b>Synonymous</b>          | 17                                 | 17      | 17      | 32      | 32      | 28      | 8       | 18      | 18      | <b>21</b>                         | 19      | 18      | 18      | 22      | 17      | 18      | 20      | 17      | 17      | <b>18</b> |   |
| <b>Non-synonymous</b>      | 27                                 | 27      | 16      | 40      | 39      | 34      | 2       | 20      | 19      | <b>25</b>                         | 32      | 23      | 24      | 15      | 28      | 15      | 12      | 23      | 10      | <b>20</b> |   |

Number of single nucleotide polymorphisms (SNPs), multinucleotide polymorphisms (MNPs), insertions, and deletions relative to the reference *H. pylori* B8 genome sequence. D1-3 and R1-3 designate independent gerbils maintained on either iron-depleted (N=3) or iron-replete (N=3) diets, respectively, while a-c designate different single colonies isolated from each gerbil. Avg represents the average among all nine single colony isolates.

**Supplementary Table 6:** Common single nucleotide polymorphisms between *in vivo*-adapted *H. pylori* strain 7.13 isolated from gerbils maintained on high salt or iron-depleted diets.

| Variant  |              |            | 7.13 high-salt single colonies |      |      |      | 7.13 iron-depleted single colonies |      |      |      |      |      |      |      |      |
|----------|--------------|------------|--------------------------------|------|------|------|------------------------------------|------|------|------|------|------|------|------|------|
| Location | Gene         | HPB8 locus | H1 a                           | H1 b | H1 c | H1 d | D1 a                               | D1 b | D1 c | D2 a | D2 b | D2 c | D3 a | D3 b | D3 c |
| 563546   | hypothetical | 593        | 100                            | 100  | 100  | 100  |                                    |      |      |      |      |      | 99   | 100  | 100  |
| 693488   | <i>cagY</i>  | 716        | 25                             |      |      |      |                                    |      |      | 100  | 93   | 100  |      |      |      |
| 693539   | <i>cagY</i>  | 716        | 25                             |      |      |      |                                    |      |      | 98   | 100  | 100  |      |      |      |
| 1117619  | hypothetical | 1139       | 100                            | 100  | 100  | 100  |                                    |      |      |      |      |      | 99   | 100  | 99   |
| 1122559  | <i>fur</i>   | 1145       | 100                            | 100  | 100  | 100  | 100                                | 99   | 100  | 100  | 100  | 99   | 100  | 100  | 100  |

H1 and D1-3 designates independent gerbils maintained on a high salt (N=1) or iron-depleted (N=3) diets, respectively, while a-d designate different single colonies isolated from each gerbil. Color-coded regions within each single colony represent single nucleotide polymorphisms (SNPs) that were present in each isolate, and the number in each box represents the percentage of reads that contained each SNP.

**Supplementary Table 7:** Summary of clinical information pertaining to *H. pylori* strains isolated from three independent and well-defined patient cohorts.

| <i>H. pylori</i> strain ID | Country  | Age | Sex | Diagnosis |
|----------------------------|----------|-----|-----|-----------|
| PZ5001                     | Colombia | 58  | M   | NAG       |
| PZ5003                     | Colombia | 44  | M   | NAG       |
| PZ5004                     | Colombia | 52  | M   | NAG       |
| PZ5005                     | Colombia | 53  | M   | NAG       |
| PZ5006                     | Colombia | 45  | M   | NAG       |
| PZ5007                     | Colombia | 58  | M   | NAG       |
| PZ5008                     | Colombia | 41  | M   | NAG       |
| PZ5009                     | Colombia | 53  | M   | NAG       |
| PZ5010                     | Colombia | 55  | M   | NAG       |
| PZ5011                     | Colombia | 56  | M   | NAG       |
| PZ5014                     | Colombia | 47  | M   | IM        |
| PZ5015                     | Colombia | 42  | M   | NAG       |
| PZ5016                     | Colombia | 40  | M   | MAG       |
| PZ5017                     | Colombia | 52  | M   | MAG       |
| PZ5018                     | Colombia | 50  | M   | NAG       |
| PZ5019                     | Colombia | 47  | M   | IM        |
| PZ5021                     | Colombia | 48  | M   | MAG       |
| PZ5022                     | Colombia | 54  | M   | IM        |
| PZ5023                     | Colombia | 48  | M   | IM        |
| PZ5024                     | Colombia | 47  | M   | NAG       |
| PZ5025                     | Colombia | 39  | M   | NAG       |
| PZ5026                     | Colombia | 47  | M   | DYS       |
| PZ5028                     | Colombia | 55  | M   | MAG       |
| PZ5029                     | Colombia | 43  | M   | NAG       |
| PZ5031                     | Colombia | 54  | M   | IM        |
| PZ5032                     | Colombia | 43  | M   | MAG       |
| PZ5033                     | Colombia | 57  | M   | IM        |
| PZ5034                     | Colombia | 44  | M   | IM        |
| PZ5035                     | Colombia | 45  | M   | NAG       |
| PZ5036                     | Colombia | 45  | M   | NAG       |
| PZ5038                     | Colombia | 39  | M   | MAG       |
| PZ5039                     | Colombia | 42  | M   | NAG       |
| PZ5043                     | Colombia | 40  | M   | DYS       |
| PZ5044                     | Colombia | 40  | M   | NAG       |
| PZ5045                     | Colombia | 44  | M   | NAG       |
| PZ5047                     | Colombia | 48  | M   | IM        |
| PZ5051                     | Colombia | 57  | M   | NAG       |
| PZ5054                     | Colombia | 47  | M   | NAG       |
| PZ5055                     | Colombia | 56  | M   | IM        |
| PZ5056                     | Colombia | 55  | M   | IM        |
| PZ5057                     | Colombia | 57  | M   | MAG       |
| PZ5058                     | Colombia | 60  | M   | IM        |
| PZ5059                     | Colombia | 55  | M   | NAG       |
| PZ5060                     | Colombia | 49  | M   | NAG       |
| PZ5062                     | Colombia | 48  | M   | MAG       |
| PZ5064                     | Colombia | 54  | M   | NAG       |
| PZ5065                     | Colombia | 52  | F   | NAG       |
| PZ5066                     | Colombia | 53  | M   | NAG       |
| PZ5068                     | Colombia | 51  | M   | IM        |
| PZ5069                     | Colombia | 46  | M   | IM        |
| PZ5070                     | Colombia | 54  | M   | IM        |
| PZ5072                     | Colombia | 49  | M   | MAG       |
| PZ5074                     | Colombia | 53  | M   | IM        |
| PZ5075                     | Colombia | 50  | M   | NAG       |
| PZ5077                     | Colombia | 53  | M   | IM        |
| PZ5078                     | Colombia | 47  | M   | IM        |
| PZ5079                     | Colombia | 46  | M   | MAG       |

|        |          |    |   |     |
|--------|----------|----|---|-----|
| PZ5080 | Colombia | 49 | M | MAG |
| PZ5081 | Colombia | 45 | F | IM  |
| PZ5082 | Colombia | 51 | M | IM  |
| PZ5083 | Colombia | 51 | M | NAG |
| PZ5084 | Colombia | 48 | M | IM  |
| PZ5085 | Colombia | 52 | F | NAG |
| PZ5086 | Colombia | 54 | M | IM  |
| PZ5087 | Colombia | 47 | M | MAG |
| PZ5088 | Colombia | 48 | M | IM  |
| PZ5090 | Colombia | 43 | M | NAG |
| PZ5091 | Colombia | 46 | M | IM  |
| PZ5093 | Colombia | 46 | M | IM  |
| PZ5094 | Colombia | 40 | M | IM  |
| PZ5095 | Colombia | 31 | M | NAG |
| PZ5096 | Colombia | 47 | M | IM  |
| PZ5097 | Colombia | 48 | M | IM  |
| PZ5098 | Colombia | 47 | M | IM  |
| PZ5099 | Colombia | 56 | M | IM  |
| PZ5100 | Colombia | 55 | M | NAG |
| PZ5102 | Colombia | 48 | M | IM  |
| PZ5104 | Colombia | 45 | M | MAG |
| PZ5105 | Colombia | 46 | M | IM  |
| PZ5111 | Colombia | 46 | M | NAG |
| PZ5112 | Colombia | 41 | M | IM  |
| PZ5113 | Colombia | 50 | M | NAG |
| PZ5114 | Colombia | 49 | M | IM  |
| NQ4001 | Colombia | 61 | F | NAG |
| NQ4002 | Colombia | 62 | M | IM  |
| NQ4005 | Colombia | 58 | M | IM  |
| NQ4014 | Colombia | 71 | M | IM  |
| NQ4016 | Colombia | 63 | M | DYS |
| NQ4017 | Colombia | 73 | F | IM  |
| NQ4018 | Colombia | 55 | F | IM  |
| NQ4019 | Colombia | 57 | F | NAG |
| NQ4023 | Colombia | 69 | F | IM  |
| NQ4025 | Colombia | 64 | M | IM  |
| NQ4034 | Colombia | 57 | F | IM  |
| NQ4038 | Colombia | 64 | F | IM  |
| NQ4043 | Colombia | 61 | M | IM  |
| NQ4044 | Colombia | 66 | F | IM  |
| NQ4045 | Colombia | 67 | M | IM  |
| NQ4046 | Colombia | 64 | M | MAG |
| NQ4048 | Colombia | 53 | F | NAG |
| NQ4050 | Colombia | 66 | F | MAG |
| NQ4051 | Colombia | 74 | M | MAG |
| NQ4053 | Colombia | 59 | M | IM  |
| NQ4056 | Colombia | 55 | F | DYS |
| NQ4060 | Colombia | 51 | F | DYS |
| NQ4061 | Colombia | 53 | M | IM  |
| NQ4062 | Colombia | 45 | F | IM  |
| NQ4063 | Colombia | 56 | F | IM  |
| NQ4064 | Colombia | 57 | F | IM  |
| NQ4066 | Colombia | 76 | F | IM  |
| NQ4072 | Colombia | 70 | M | DYS |
| NQ4073 | Colombia | 68 | M | IM  |
| NQ4075 | Colombia | 52 | M | DYS |
| NQ4076 | Colombia | 57 | M | MAG |
| NQ4077 | Colombia | 72 | F | IM  |
| NQ4078 | Colombia | 56 | M | IM  |
| NQ4080 | Colombia | 57 | F | IM  |
| NQ4081 | Colombia | 62 | M | IM  |
| NQ4084 | Colombia | 52 | F | IM  |
| NQ4085 | Colombia | 71 | M | IM  |
| NQ4094 | Colombia | 50 | F | IM  |

|        |          |    |   |     |
|--------|----------|----|---|-----|
| NQ4095 | Colombia | 59 | F | IM  |
| NQ4097 | Colombia | 53 | M | IM  |
| NQ4098 | Colombia | 65 | M | MAG |
| NQ4099 | Colombia | 68 | F | IM  |
| NQ4100 | Colombia | 61 | F | DYS |
| NQ4102 | Colombia | 66 | F | MAG |
| NQ4103 | Colombia | 57 | F | IM  |
| NQ4104 | Colombia | 70 | M | DYS |
| NQ4107 | Colombia | 64 | M | MAG |
| NQ4108 | Colombia | 67 | M | IM  |
| NQ4110 | Colombia | 55 | M | MAG |
| NQ4113 | Colombia | 75 | F | IM  |
| NQ4117 | Colombia | 73 | F | MAG |
| NQ4122 | Colombia | 68 | M | IM  |
| NQ4124 | Colombia | 49 | M | DYS |
| NQ4127 | Colombia | 60 | F | MAG |
| NQ4130 | Colombia | 67 | M | IM  |
| NQ4134 | Colombia | 68 | F | IM  |
| NQ4135 | Colombia | 71 | M | IM  |
| NQ4137 | Colombia | 71 | F | MAG |
| NQ4145 | Colombia | 71 | F | IM  |
| NQ4147 | Colombia | 61 | F | IM  |
| NQ4153 | Colombia | 62 | M | IM  |
| NQ4156 | Colombia | 72 | F | IM  |
| NQ4157 | Colombia | 55 | M | IM  |
| NQ4161 | Colombia | 67 | F | MAG |
| NQ4162 | Colombia | 58 | M | NAG |
| NQ4175 | Colombia | 48 | F | IM  |
| NQ4178 | Colombia | 84 | M | MAG |
| NQ4185 | Colombia | 62 | F | IM  |
| NQ4187 | Colombia | 77 | M | IM  |
| NQ4191 | Colombia | 55 | F | IM  |
| NQ4194 | Colombia | 71 | F | IM  |
| NQ4195 | Colombia | 72 | F | MAG |
| NQ4197 | Colombia | 60 | M | IM  |
| NQ4200 | Colombia | 62 | F | IM  |
| NQ4203 | Colombia | 59 | M | NAG |
| NQ4207 | Colombia | 56 | F | MAG |
| NQ4211 | Colombia | 68 | F | IM  |
| NQ4216 | Colombia | 78 | M | DYS |
| NQ4217 | Colombia | 82 | F | IM  |
| NQ4223 | Colombia | 57 | M | DYS |
| NQ4228 | Colombia | 65 | F | IM  |
| NQ4229 | Colombia | 76 | F | IM  |
| NQ4236 | Colombia | 76 | M | IM  |
| NQ4240 | Colombia | 60 | F | IM  |
| NQ4245 | Colombia | 58 | M | IM  |
| NQ4248 | Colombia | 75 | F | IM  |
| NQ4249 | Colombia | 65 | F | IM  |
| NQ4250 | Colombia | 76 | F | IM  |
| NQ4259 | Colombia | 67 | F | NAG |
| NQ4261 | Colombia | 56 | F | IM  |
| NQ4262 | Colombia | 56 | M | IM  |
| NQ4264 | Colombia | 69 | F | IM  |
| NQ4265 | Colombia | 81 | M | IM  |
| NQ4269 | Colombia | 83 | F | IM  |
| NQ4270 | Colombia | 72 | M | IM  |
| NQ4271 | Colombia | 58 | M | IM  |
| NQ4275 | Colombia | 69 | M | IM  |
| NQ4277 | Colombia | 75 | F | IM  |
| NQ4281 | Colombia | 62 | M | MAG |
| NQ4282 | Colombia | 73 | M | MAG |
| NQ4287 | Colombia | 59 | M | NAG |
| NQ4299 | Colombia | 56 | F | NAG |
| NQ4303 | Colombia | 58 | M | IM  |

|        |               |    |   |     |
|--------|---------------|----|---|-----|
| NQ4304 | Colombia      | 83 | F | NAG |
| NQ4305 | Colombia      | 66 | M | DYS |
| NQ4307 | Colombia      | 58 | M | IM  |
| NQ4309 | Colombia      | 66 | M | IM  |
| NQ4311 | Colombia      | 55 | F | MAG |
| NQ4312 | Colombia      | 72 | F | IM  |
| NQ4314 | Colombia      | 68 | M | IM  |
| NQ4315 | Colombia      | 57 | F | NAG |
| NQ4318 | Colombia      | 56 | M | IM  |
| NQ4319 | Colombia      | 62 | M | MAG |
| NQ4322 | Colombia      | 58 | M | IM  |
| NQ4326 | Colombia      | 73 | F | NAG |
| NQ4328 | Colombia      | 66 | M | IM  |
| NQ4330 | Colombia      | 63 | M | IM  |
| NQ4331 | Colombia      | 69 | M | IM  |
| NQ4332 | Colombia      | 60 | M | IM  |
| NQ4335 | Colombia      | 65 | F | NAG |
| NQ4337 | Colombia      | 56 | M | IM  |
| NQ4352 | Colombia      | 67 | F | NAG |
| NQ4356 | Colombia      | 79 | F | DYS |
| NQ4359 | Colombia      | 61 | M | IM  |
| NQ4371 | Colombia      | 65 | M | MAG |
| NQ4373 | Colombia      | 57 | M | DYS |
| NQ4379 | Colombia      | 64 | M | IM  |
| NQ4381 | Colombia      | 62 | M | IM  |
| NQ4386 | Colombia      | 78 | M | DYS |
| NQ4387 | Colombia      | 66 | M | MAG |
| NQ4390 | Colombia      | 77 | F | IM  |
| NQ4391 | Colombia      | 54 | F | IM  |
| NQ4393 | Colombia      | 62 | M | IM  |
| NQ4394 | Colombia      | 72 | M | MAG |
| NQ4395 | Colombia      | 67 | M | MAG |
| NQ4396 | Colombia      | 50 | F | DYS |
| NQ4400 | Colombia      | 74 | M | DYS |
| NQ4407 | Colombia      | 72 | M | IM  |
| NQ4408 | Colombia      | 77 | F | IM  |
| NQ4409 | Colombia      | 70 | M | IM  |
| NQ4410 | Colombia      | 64 | F | DYS |
| NQ4412 | Colombia      | 62 | F | IM  |
| NQ4416 | Colombia      | 72 | F | IM  |
| NQ4421 | Colombia      | 53 | F | NAG |
| NQ4430 | Colombia      | 57 | F | IM  |
| NQ4431 | Colombia      | 59 | M | MAG |
| NQ4432 | Colombia      | 66 | M | IM  |
| NQ4433 | Colombia      | 46 | F | MAG |
| NQ4436 | Colombia      | 72 | F | DYS |
| NQ4438 | Colombia      | 66 | F | MAG |
| NQ4443 | Colombia      | 57 | M | IM  |
| NQ4444 | Colombia      | 72 | F | DYS |
| NQ4445 | Colombia      | 73 | M | IM  |
| NQ4446 | Colombia      | 75 | F | IM  |
| NQ4447 | Colombia      | 58 | F | MAG |
| NQ4449 | Colombia      | 57 | M | IM  |
| NQ4450 | Colombia      | 66 | M | IM  |
| NQ4456 | Colombia      | 50 | M | DYS |
| 93-6   | United States | 70 | M | NAG |
| 93-65  | United States | 40 | M | NAG |
| 93-66  | United States | 57 | M | NAG |
| J44    | United States | 64 | M | MAG |
| J39    | United States | 68 | M | NAG |
| J54    | United States | 78 | M | NAG |
| J58    | United States | 53 | M | NAG |
| J63    | United States | 53 | M | NAG |
| J68    | United States | 33 | M | NAG |

|       |               |    |   |     |
|-------|---------------|----|---|-----|
| J75   | United States | 62 | M | NAG |
| J99   | United States | 48 | M | MAG |
| J104  | United States | 65 | M | IM  |
| J117  | United States | 59 | M | MAG |
| J133  | United States | 57 | M | MAG |
| J134  | United States | 59 | M | NAG |
| J150  | United States | 52 | M | NAG |
| J154  | United States | 61 | M | NAG |
| J166  | United States | 56 | M | NAG |
| J170  | United States | 56 | M | NAG |
| J174  | United States | 69 | M | IM  |
| J178  | United States | 61 | M | IM  |
| J182  | United States | 61 | M | IM  |
| J188  | United States | 54 | M | IM  |
| J190  | United States | 44 | M | NAG |
| J195  | United States | 44 | M | NAG |
| J198  | United States | 72 | M | NAG |
| J226  | United States | 31 | M | NAG |
| J238  | United States | 56 | M | IM  |
| J243  | United States | 73 | M | NAG |
| J253  | United States | 48 | M | NAG |
| J254  | United States | 45 | M | NAG |
| J262  | United States | 63 | M | MAG |
| J291  | United States | 27 | M | NAG |
| A101  | United States | 33 | M | NAG |
| B89   | United States | 76 | M | IM  |
| B93   | United States | 46 | M | NAG |
| B96A  | United States | 32 | M | NAG |
| B99A  | United States | 52 | M | MAG |
| B105A | United States | 44 | M | IM  |
| B107A | United States | 60 | M | NAG |
| B108A | United States | 56 | M | IM  |
| B116A | United States | 84 | M | NAG |
| B119A | United States | 65 | M | MAG |
| B120A | United States | 62 | M | NAG |
| B127A | United States | 69 | M | NAG |
| B128A | United States | 48 | M | MAG |
| B130A | United States | 62 | M | IM  |
| B134A | United States | 58 | M | NAG |
| B135A | United States | 48 | M | NAG |
| B136A | United States | 67 | M | MAG |
| B137A | United States | 78 | M | NAG |
| B140A | United States | 31 | M | NAG |
| B141A | United States | 55 | M | MAG |
| B146A | United States | 67 | M | MAG |
| B147A | United States | 58 | M | MAG |
| B148A | United States | 59 | M | IM  |
| B151A | United States | 84 | M | MAG |
| B158A | United States | 55 | M | NAG |
| B166A | United States | 61 | M | NAG |
| B173A | United States | 72 | M | IM  |
| B175A | United States | 66 | M | NAG |
| B177A | United States | 64 | M | NAG |
| B179A | United States | 52 | M | NAG |
| B181A | United States | 40 | M | NAG |
| B185A | United States | 66 | M | IM  |
| B186A | United States | 44 | M | NAG |
| B194A | United States | 74 | M | NAG |
| B201A | United States | 68 | M | NAG |
| B202A | United States | 63 | M | NAG |
| B208A | United States | 77 | M | NAG |
| B211A | United States | 39 | M | NAG |
| B212A | United States | 73 | M | NAG |
| B213A | United States | 66 | M | IM  |
| B215A | United States | 69 | M | MAG |



|       |               |    |   |     |
|-------|---------------|----|---|-----|
| B218A | United States | 80 | M | IM  |
| B221A | United States | 50 | F | NAG |
| B223A | United States | 75 | M | NAG |
| B228A | United States | 56 | M | NAG |
| B234A | United States | 69 | M | NAG |
| B235A | United States | 55 | M | IM  |
| B238A | United States | 70 | M | MAG |
| B240A | United States | 48 | M | MAG |
| B251A | United States | 66 | M | NAG |
| B253A | United States | 71 | M | NAG |
| B254A | United States | 57 | M | MAG |
| B255A | United States | 66 | M | IM  |
| B256A | United States | 66 | M | MAG |
| B258A | United States | 52 | M | MAG |
| B263A | United States | 51 | M | NAG |
| B265A | United States | 71 | M | MAG |
| B266A | United States | 60 | M | NAG |
| B267A | United States | 77 | M | NAG |
| B268A | United States | 74 | M | MAG |
| B269A | United States | 53 | M | MAG |
| B277A | United States | 56 | M | NAG |
| B279A | United States | 52 | M | NAG |
| B284A | United States | 67 | M | IM  |
| B291A | United States | 67 | M | NAG |

*H. pylori* strain identification (ID) number, patient country of origin, age, sex, and histologic diagnoses are shown. NAG = non-atrophic gastritis alone; MAG = multifocal atrophic gastritis; IM = intestinal metaplasia; DYS = dysplasia. Samples highlighted in yellow designate clinical *H. pylori* strains harboring the *fur* SNP (FurR88H).
